# Supplementary material
Source: PubMed Central journal article supplement (PMC6442639)
Supplement: pnas.1818580116.sapp.pdf [file pnas.1818580116.sapp.pdf]

# SI Appendix

## Energy conservation by a hydrogenase-dependent chemiosmotic mechanism in an ancient metabolic pathway

Marie Charlotte Schoelmerich and Volker Müller

Corresponding author: Volker Müller

Email: [vmueller@bio.uni-frankfurt.de](mailto:vmueller@bio.uni-frankfurt.de)

This PDF file includes:

**Supplementary Materials and Methods**

**Supplementary Figures:** Fig. S1 to S8

**Supplementary Tables:** Tab. S1 to S2

**Supplementary References**

## Supplementary Materials and Methods

---

### 17 18 **Organism and cultivation**

19 *T. kivui* LKT-1 (DSM 2030) was routinely cultivated on complex medium at 60°C. The medium  
20 was prepared using the anaerobic techniques described previously (1, 2). Cultivation of *T. kivui*  
21 was carried out in 1-l-flasks (Müller-Krempel) containing 200 ml complex medium for cultivation  
22 on CO + CO<sub>2</sub> (50% CO, 10% CO<sub>2</sub>, 40% N<sub>2</sub> at 2.0 × 10<sup>5</sup> Pa) or H<sub>2</sub> + CO<sub>2</sub> (50% H<sub>2</sub>, 20% CO<sub>2</sub>,  
23 30% N<sub>2</sub> at 1.5 × 10<sup>5</sup> Pa), or in 1-l-flasks (Müller-Krempel) containing 500 ml complex medium  
24 for cultivation on 25 mM glucose + CO<sub>2</sub> (20% CO<sub>2</sub>, 80% N<sub>2</sub> at 1.3 × 10<sup>5</sup> Pa). Complex medium  
25 contained: 50 mM NaH<sub>2</sub>PO<sub>4</sub>, 50 mM NaH<sub>2</sub>HPO<sub>4</sub>, 1.2 mM K<sub>2</sub>HPO<sub>4</sub>, 1.6 mM KH<sub>2</sub>PO<sub>4</sub>, 4.7 mM  
26 NH<sub>4</sub>Cl, 1.7 mM (NH<sub>4</sub>)<sub>2</sub>SO<sub>4</sub>, 7.5 mM NaCl, 0.37 mM MgSO<sub>4</sub>, 42 μM CaCl<sub>2</sub>, 7.2 μM Fe(II)SO<sub>4</sub>,  
27 54 mM KHCO<sub>3</sub>, 3 mM cysteine-HCl, 0.2% [w/v] yeast extract, 1.0% [v/v] trace element solution  
28 (DSM 141), 1.0% [v/v] vitamin solution (DSM 141) and 4 μM resazurin. Growth was determined  
29 by measuring the optical density at 600 nm (OD<sub>600</sub>).

30

### 31 **Preparation and experiments with resting cells**

32 *T. kivui* was cultivated on CO + CO<sub>2</sub>, H<sub>2</sub> + CO<sub>2</sub> or glucose and the preparation of resting cells  
33 was performed under strictly anoxic conditions in an anaerobic chamber (Coy Laboratory  
34 Products). Cells were harvested by centrifugation (11,500 × g, 10 min, 4°C) at OD<sub>600</sub> 0.2,  
35 0.4 or 1.8 – 2.2, washed with resting cell buffer (50 mM imidazole (pH 7.0) containing 50 mM  
36 KHCO<sub>3</sub>, 20 mM MgSO<sub>4</sub>, 20 mM KCl, 20 mM NaCl, 4 mM DTE and 4 μM resazurin),  
37 resuspended in 1 ml and kept in a gas-tight Hungate tube under a 100% N<sub>2</sub> atmosphere. The  
38 protein concentration was determined according to (3). The experiments with resting cells were  
39 carried out in crimped sealed 120-ml serum bottles or 8-ml-glass vials at a final liquid volume  
40 of 1 or 20 ml. The assays were composed of 1 ml H<sub>2</sub> evolution buffer I (50 mM Tris buffer  
41 (pH 7.0) containing 4 mM DTE and 4 μM resazurin) containing 1 mg/ml protein with 100% N<sub>2</sub>  
42 for H<sub>2</sub> evolution (Fig. 1A), 20 ml resting cell buffer containing 1 mg/ml protein with N<sub>2</sub>+CO<sub>2</sub>  
43 (80:20 [v/v]) for ATP measurements (Fig. 1B) or 1 ml H<sub>2</sub> evolution buffer II (I + 5 mM NaCl)  
44 containing 0.5 mg/ml protein with 100% N<sub>2</sub> for H<sub>2</sub> evolution with uncouplers (Fig. 1C). The

## Supplementary Materials and Methods

---

45 assays were preheated to a temperature of 60°C for 10 min in a water bath and the reaction  
46 was started by flushing the vials with 100% CO for 20 s. 50 µl gaseous samples were  
47 withdrawn and directly injected into the gas chromatograph (Fig. 1A, C). The intracellular ATP  
48 content was detected (Fig. 1B) as described previously (4).

49 To analyse the effect of Na<sup>+</sup>, CO-pregrown cells were incubated in 8-ml-glass vials  
50 containing a 100% N<sub>2</sub> gas atmosphere and 1 ml H<sub>2</sub> evolution buffer I (50 mM Tris buffer  
51 (pH 7.0) containing 2 mM DTE and 4 µM resazurin (*SI Appendix*, Fig. S2) or  
52 10 mM MES/MOPS/Tris buffer (pH 6.0 (●), 7.0 (○) or 8.0 (▲)) containing 2 mM DTE and 4 µM  
53 resazurin (*SI Appendix*, Fig. S3). NaCl (■) or KCl (□) was added as indicated. The assays were  
54 treated as described above.

55

### 56 **Determination of H<sub>2</sub>, CO and acetate**

57 The concentration of H<sub>2</sub>, CO and acetate was determined as described previously (4).

58

### 59 **Preparation of inverted membrane vesicles**

60 *T. kivui* was grown on CO as described above, harvested by centrifugation (14,300 × g, 15 min,  
61 4°C) and washed in vesicle buffer (60 mM KP<sub>i</sub> buffer (pH 6.0) containing 420 mM sucrose,  
62 20 mM MgSO<sub>4</sub>, 8 mM DTE and 4 µM resazurin). For the cell disruption, the cells were  
63 suspended in the same buffer, supplemented with 100 µM PMSF and a few crystals of DNase.  
64 Cells were passed through a French pressure cell at 41 MPa, which resulted in the formation  
65 of crude vesicles. The remaining unbroken cells as well as cell debris were removed by  
66 centrifugation (6,250 × g, 45 min, 4°C). This step was repeated twice. The supernatant was  
67 then ultracentrifuged at 208,000 × g for 45 min at 4°C to collect IMVs. When indicated, the  
68 IMVs were washed, and finally resuspended in buffer (depending on the subsequent  
69 experiment) to a protein concentration of 3.0-5.0 mg/ml. The protein concentration was  
70 determined as described previously (5).

71 To determine whether the IMVs are bioenergetically coupled, energization with an artificial  
72 ammonium diffusion potential was tested. For this, a small portion of the IMV preparation was

## Supplementary Materials and Methods

---

73 resuspended in aerobic 500 mM NH<sub>4</sub>Cl-containing buffer (10 mM Tris buffer (pH 8.0)  
74 containing 500 mM NH<sub>4</sub>Cl, 420 mM sucrose and 5 mM MgCl<sub>2</sub>). Next, 5 µl of IMVs were diluted  
75 in 500 µl buffer containing no NH<sub>4</sub>Cl (10 mM Tris buffer (pH 8.0) containing 500 mM choline  
76 chloride, 420 mM sucrose and 5 mM MgCl<sub>2</sub>) and 4 µM ACMA (from a 2 mM ethanolic stock  
77 solution). Fluorescence was measured in a fluorescence cell (High Precision Cell, 3 × 3 mm  
78 light path; Hellma Analytics) in a fluorescence spectrophotometer (F-4500; Hitachi) with an  
79 excitation at 410 nm and emission at 490 nm.

80

### 81 **Measurement of Ech activity at IMVs**

82 Ech activity was investigated by measuring H<sub>2</sub> evolution using CO, or the artificial electron  
83 donors sodium dithionite or titanium (III) citrate as reductant. The assays were carried out in  
84 crimp sealed 8-ml-glass vials at a final liquid volume of 1 ml. The vials were filled with IMV  
85 buffer (50 mM MES buffer (pH 6.0) containing 420 mM sucrose, 10 mM MgCl<sub>2</sub>, 8 mM DTE and  
86 4 µM resazurin with or without 5 mM NaCl and with 100 mM KCl where indicated) in a 100%  
87 N<sub>2</sub> gas atmosphere. IMVs were added, supplemented with ferredoxin as indicated and, if  
88 applicable, 20 µM K<sup>+</sup> ionophore valinomycin or 30 µM protonophore TCS or Na<sup>+</sup> ionophore  
89 ETH2120. The assays were preheated to 60°C in a water bath for 10 min and the reaction was  
90 started by flushing the vials with 100% CO for 20 s, or by the addition of 1.5 mM sodium  
91 dithionite or 1 mM titanium (III) citrate. In control experiments, the uncouplers were substituted  
92 with solvents (DMSO for valinomycin or ethanol for TCS and ETH2120). 50 µl gaseous  
93 samples were continuously withdrawn and directly injected into the gas chromatograph.

94

### 95 **Measurement of <sup>22</sup>Na<sup>+</sup> translocation**

96 The experiments were performed under anaerobic conditions in rubber stopper-sealed 3.5-ml-  
97 glass vials at a final liquid volume of 500 µl. 0.5 mg/ml IMVs were incubated in IMV buffer with  
98 contaminating Na<sup>+</sup> concentration of 280 µM, as determined by an Orion Star A214 sodium  
99 electrode (Thermo Fisher Scientific). The assay was supplemented with 30 µM ferredoxin and,  
100 when applicable, 20 µM ETH2120 or 20 µM TCS. <sup>22</sup>NaCl (final activity 1 µCi/ml carrier-free)

## Supplementary Materials and Methods

---

101 was added and incubated for 30 min to ensure Na<sup>+</sup> equilibrium before the reaction was started.  
102 After 4 min, 1 mM titanium (III) citrate was added or the vial was flushed with 100% CO for  
103 10 s. Control experiments received ethanol instead of the uncoupler. The samples were taken  
104 and radioactivity was measured as described previously (6).

105

### 106 **Measurement of H<sup>+</sup> translocation**

107 The experiments were performed at 40 or 60°C in a fluorescence cell (High Precision Cell, 3×3  
108 mm light path; Hellma Analytics) at a final liquid volume of 250 µl with a 100% CO gas  
109 atmosphere. 0.5 mg/ml IMVs were incubated in IMV buffer with a contaminating Na<sup>+</sup>  
110 concentration of 280 µM in the presence of 4 µM ACMA. 20 µM protonophore TCS or 20 µM  
111 sodium ionophore ETH2120 and 150 mM NaCl were additionally added where indicated. After  
112 equilibration, 30 µg CODH (purified from *A. woodii* according to (7)) and 30 µM ferredoxin were  
113 added as indicated. The quench was abolished by addition of 10 µl of 90% (NH<sub>4</sub>)<sub>2</sub>SO<sub>4</sub>.  
114 Fluorescence was measured in a fluorescence spectrophotometer (Fluorolog-3, HORIBA  
115 Scientific) with excitation at 410 nm and emission at 490 nm.

116

### 117 **Determination of relative transcript levels**

118 To analyze gene expression of *ech1* and *ech2*, cultures of *T. kivui* were grown on CO+CO<sub>2</sub>,  
119 H<sub>2</sub>+CO<sub>2</sub> or glucose and harvested by centrifugation (10,000 × g, 10 min, 4°C) at OD<sub>600</sub> 0.3, 0.4  
120 or 0.8, frozen in liquid nitrogen and stored at -80°C until RNA extraction. Total RNA was  
121 isolated using the InviTrap Spin Cell RNA Mini kit (Stratag Molecular) with some modifications.  
122 After lysozyme treatment, the lysis solution was added to the cells where they were fully lysed  
123 in a cell disrupter (Retsch) at 30 Hz for 5 min. The cell debris was separated by centrifugation  
124 (14,000 × g, 10 min, 4°C) and the supernatant was used as described in the kit protocol. 10  
125 µg nucleic acids were used for DNaseI treatment (Promega) in the presence of Rnasin  
126 (Promega). The nucleic acids were precipitated using 2.5 volumes 100% ethanol and 1/10  
127 volume 3 M sodium acetate (pH 6.5). Subsequently, the sample was and incubated at -20°C  
128 for 1 h and centrifuged (11,000 × g, 30 min, 4°C). The precipitate was washed in 500 µl ice-

## Supplementary Materials and Methods

---

129 cold 70% ethanol and centrifuged ( $11,000 \times g$ , 30 min,  $4^{\circ}\text{C}$ ). The supernatant was discarded  
130 and the pellet was air-dried and then solved in 20  $\mu\text{l}$  RNase-free MQ water. The RNA was  
131 checked using an agarose gel (1% (w/v) in  $1\times\text{TBE}$  buffer). Afterwards, 1  $\mu\text{g}$  RNA was used for  
132 reverse transcription using M-MLV Reverse Transcriptase according to the manufacturer's  
133 protocol (Promega). All quantitative PCRs (qPCRs) were performed in triplicate, using SYBR  
134 Green qPCR Kits (2 $\times$ without ROX) (Thermo Fisher Scientific). Expression of the *ech* clusters  
135 was analyzed using primers raised against the first genes of each cluster, *ech1A* and *ech2D*.  
136 The two genes encoding the gyrase subunit B (*gyrB*) and the aconitase (*acn*) were used as  
137 housekeeping genes and changes in mRNA expression levels were calculated according to  
138 (8) and (9). Primers used for qPCR are listed in Tab. S2. The relative mRNA levels were  
139 calculated from two biological independent experiments.

## Supplementary Figures

---

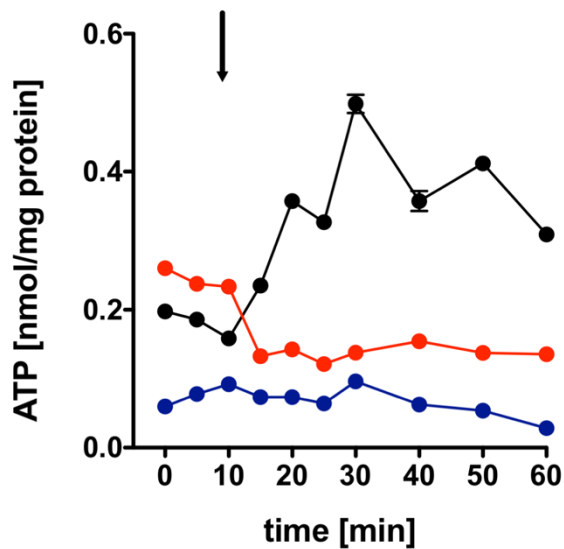

140  
141 **Fig. S1. ATP synthesis is inhibited by ionophores in resting cells.** *T. kivui* cells were  
142 harvested from CO-grown cultures in the exponential growth phase, washed and resuspended  
143 to a protein concentration of 1 mg/ml in 20 ml of buffer (50 mM imidazole (pH 7.0) containing  
144 50 mM KHCO<sub>3</sub>, 20 mM MgSO<sub>4</sub>, 20 mM KCl, 20 mM NaCl, 4 mM DTE and 4 μM resazurin) in  
145 120-ml-serum bottles containing an N<sub>2</sub>+CO<sub>2</sub> (80:20 [v/v]) gas atmosphere. Cells were  
146 preincubated for 10 minutes at 60°C. The assay contained no ionophore (●), 30 μM  
147 protonophore TCS (●) or 30 μM sodium ionophore ETH2120 (●). Vials were flushed with CO  
148 for 20 seconds, as indicated by the arrow. The ATP content was measured by using the  
149 luciferin-luciferase assay (10). Shown is the average of two measurements from one  
150 representative out of two experiments. Some of the data was already published (4).  
151

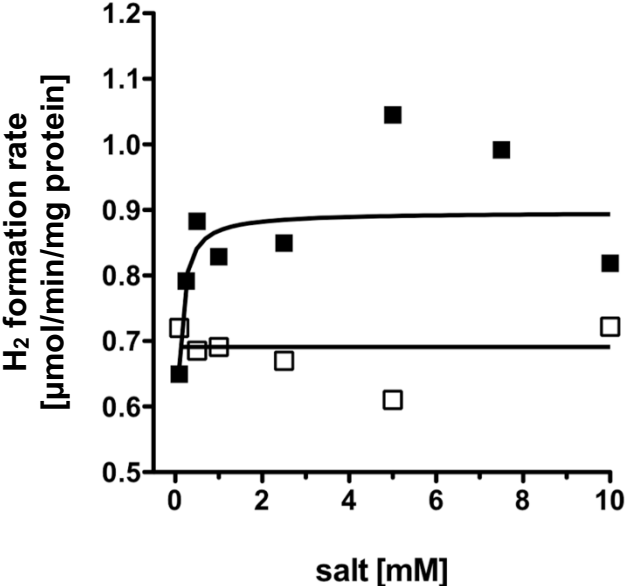

152  
153 **Fig. S2. H<sub>2</sub> formation from CO is stimulated by Na<sup>+</sup>.** Resting cells (0.5 mg/ml) pregrown on  
154 CO evolved H<sub>2</sub> from CO. NaCl (0.25-10 mM; ■) but not equal amounts of KCl (□) stimulated  
155 this activity. Curve fitting was performed using GraphPad Prism Version 4.03 and the  
156 Michaelis-Menten equation.  
157  
158  
159



## Supplementary Figures

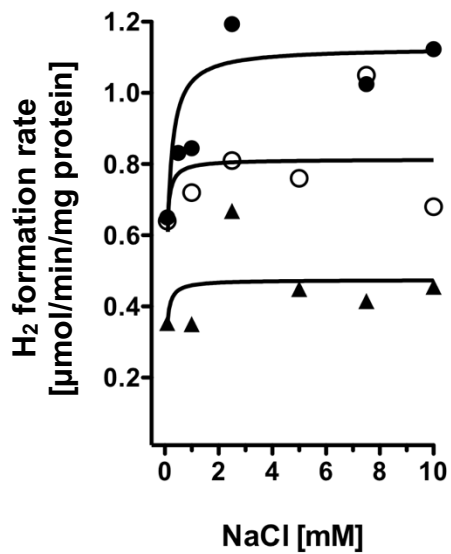

160  
161  
162  
163  
164  
165  
166  
167  
168  
169

**Fig. S3. H<sub>2</sub> formation is stimulated by Na<sup>+</sup> in resting cells.** *T. kivui* was grown on CO. Cells were harvested, washed and resuspended to a protein concentration of 0.5 mg/ml in 1 ml of buffer (10 mM MES/MOPS/Tris buffer (pH 6.0 (●), 7.0 (○) or 8.0 (▲)) containing 2 mM DTE and 4 μM resazurin). The assay was carried out in 8-ml-glass vials containing a 100% N<sub>2</sub> gas atmosphere. After an incubation of the cells at 60°C for 15 minutes, the reaction was started by flushing the vial with CO for 20 seconds. The data shown are representative of two experiments using independent preparations. Curve fitting was performed using GraphPad Prism Version 4.03 and the Michaelis-Menten equation.

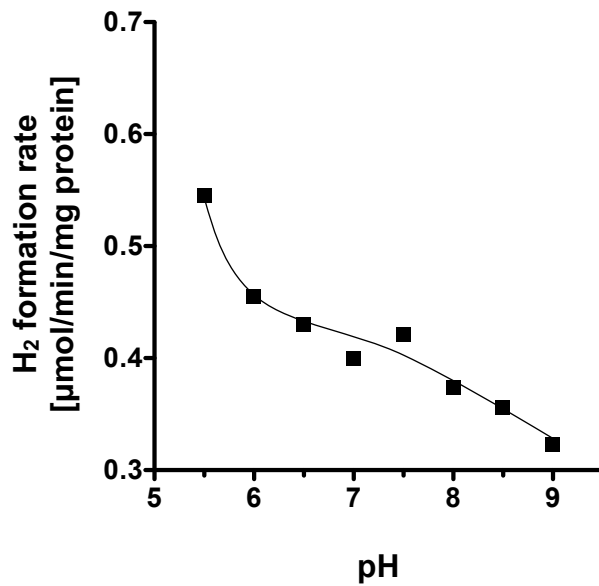

170

171 **Fig. S4. pH optimum of CO-dependent H<sub>2</sub> evolution in resting cells.** *T. kivui* was grown on  
172 CO. Cells were harvested in the exponential growth phase, washed and resuspended to a  
173 protein concentration of 1 mg/ml in 1 ml of buffer (10 mM MES/MOPS/Tris-HCl, 5 mM NaCl,  
174 2 mM DTE and 4 μM resazurin, pH 5.5-9.0). The assay was carried out in 8-ml-glass vials with  
175 a 100% N<sub>2</sub> gas atmosphere. After an incubation of the cells at 60°C for 15 minutes, the reaction  
176 was started by flushing the vial with CO for 20 seconds. Shown is the average of two  
177 measurements from one representative experiment out of two independent replicates.

## Supplementary Figures

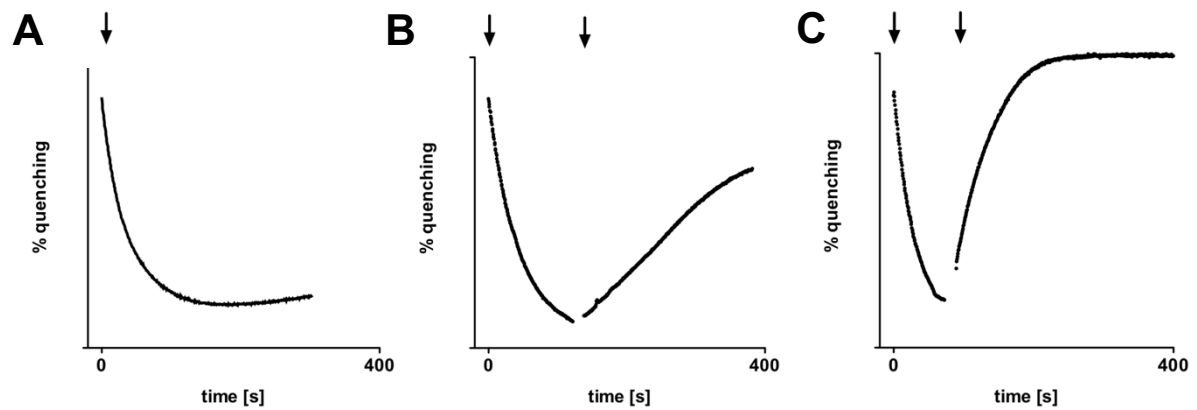

178

179

180

181

182

183

184

185

**Fig. S5. Establishment of an artificial pH gradient in IMVs.** The artificial pH gradient was formed upon addition (first arrow) of 20  $\mu\text{g}$  washed IMVs loaded with 500 mM  $\text{NH}_4\text{Cl}$  to a final liquid volume of 500  $\mu\text{l}$  composed of 10 mM Tris buffer (pH 8.0) containing 420 mM sucrose, 500 mM choline chloride, 5 mM  $\text{MgCl}_2$  and 4  $\mu\text{M}$  ACMA in a fluorescence cell under aerobic conditions at RT. The quench was maintained for 5 minutes (A) or could be relieved (second arrow) by addition of 30  $\mu\text{M}$  TCS (B) or 20  $\mu\text{l}$  1-butanol (C). Fluorescence was measured in a fluorescence spectrophotometer with an excitation of 410 nm and an emission of 490 nm.

## Supplementary Figures

---

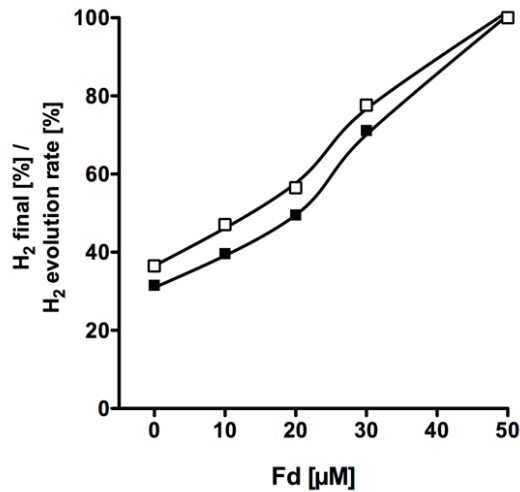

186  
187  
188  
189  
190  
191  
192  
193  
194  
195

**Fig. S6. Stimulation of CO-dependent H<sub>2</sub> evolution by ferredoxin.** 60  $\mu\text{g}$  washed IMVs were incubated in an 8-ml-glass vial containing buffer (60 mM KP<sub>i</sub> (pH 6.0) containing 420 mM sucrose, 20 mM MgSO<sub>4</sub>, 8 mM DTE and 4  $\mu\text{M}$  resazurin) at an overall liquid volume of 1 ml under a 100% N<sub>2</sub> gas atmosphere at 60°C. The assays were supplemented with 0-50  $\mu\text{M}$  ferredoxin. The reaction was started by flushing the assay with CO for 20 seconds. The final amount of H<sub>2</sub> evolved (■) and the H<sub>2</sub> evolution rate (□) is plotted in % against the ferredoxin concentration added to the assay.

## Supplementary Figures

---

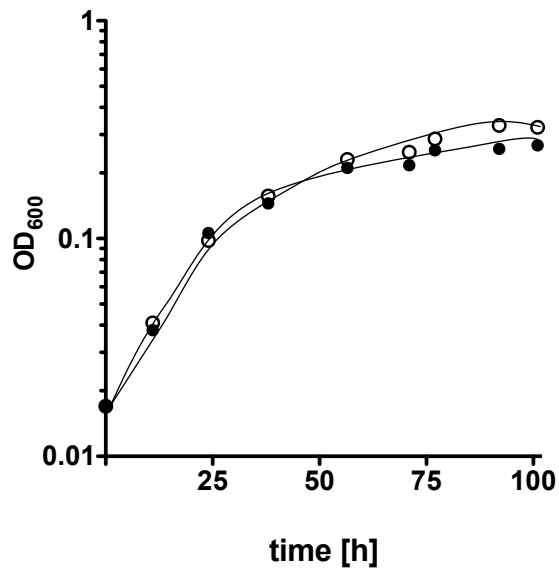

196  
197 **Fig. S7. Effect of Na<sup>+</sup> on autotrophic growth with CO.** *T. kivui* was cultivated on CO (50%  
198 CO, 40% N<sub>2</sub> and 10% CO<sub>2</sub> at  $2.0 \times 10^5$  Pa) in 20 ml Na<sup>+</sup> enriched (●; 56 mM NaCl) or Na<sup>+</sup>-  
199 deprived (○; 56 mM KCl) minimal medium. Precultures were grown for three transfers in the  
200 same medium. Two biological duplicates were analysed and one representative growth curve  
201 is depicted.  
202

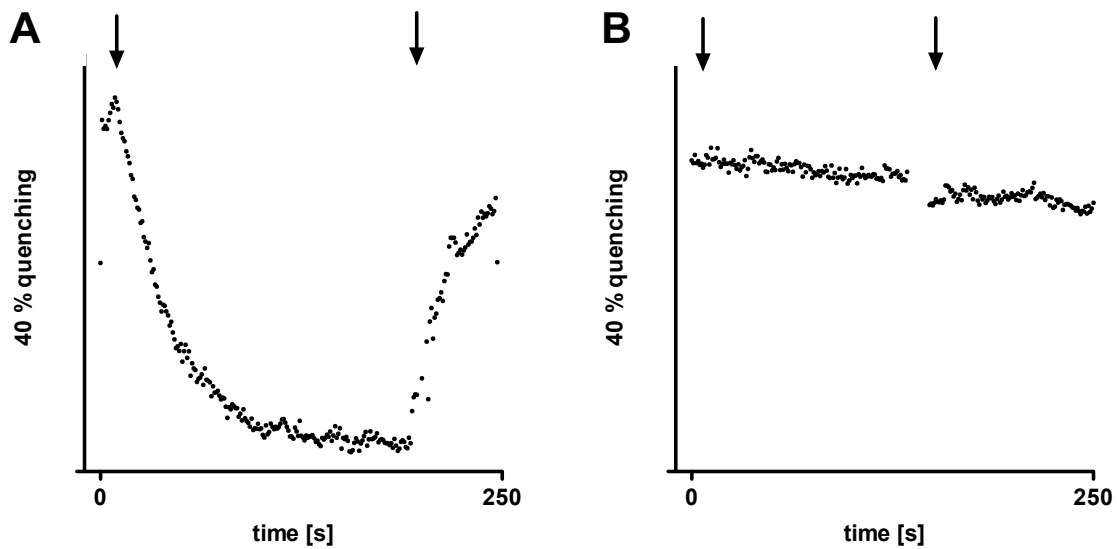

203  
204 **Fig. S8. ATP-driven H<sup>+</sup> transport into IMVs.** 125  $\mu$ g (A) or no (B) washed IMVs were  
205 incubated in 250  $\mu$ l buffer (50 mM MES buffer (pH 6.0) containing 420 mM sucrose, 10 mM  
206 MgCl<sub>2</sub>, 8 mM DTE, 281  $\mu$ M NaCl and 4  $\mu$ M resazurin), with 4  $\mu$ M ACMA, in a fluorescence  
207 cuvette under aerobic conditions at 60°C. The reaction was started by addition of 2 mM  
208 MgATP, as indicated by the arrow. The quench was abolished by addition of 10  $\mu$ l 90%  
209 (NH<sub>4</sub>)<sub>2</sub>SO<sub>4</sub>, as indicated by the second arrow. The measurement was carried out at an  
210 excitation- and emission wavelength of 410 nm and 490 nm, respectively. The data shown are  
211 representative of two experiments using independent IMV preparations.

## Supplementary Tables

212  
213

**Tab. S1. Comparison of Ech subunits from *T. kivui* with corresponding subunits of other related complexes.**

| subunit      | cofactor/<br>TMH | proposed<br>function                    | <i>E. coli</i> |                |                | <i>M. barkeri</i> |                   | <i>C. h.</i> |          | <i>P. furiosus</i> |               |
|--------------|------------------|-----------------------------------------|----------------|----------------|----------------|-------------------|-------------------|--------------|----------|--------------------|---------------|
| Ech1         |                  |                                         | Nuo            | Hyc            | Hyf            | Ech               | Fpo               | Coo          | Nuo      | Mbh                | Mbx           |
| <b>1A</b>    | 19 TMHs          | anchor, ion transport                   | M/L<br>26/28   | C<br>32        | B/C<br>32/30   | A*<br>26          | M/L/N<br>30/29/28 | M<br>29      | L<br>28  | H<br>25            | H'/H<br>30/26 |
| <b>1B</b>    | 8 TMHs           | anchor, ion transport                   | H<br>29        | C/D<br>32/27   | -              | B<br>27           | H<br>29           | K<br>46      | H<br>28  | M<br>33            | M<br>32       |
| <b>1C</b>    | 1[Fe-S]          | small hyd,<br>e <sup>-</sup> transfer   | B<br>32        | G<br>37        | I<br>34        | C<br>45           | B<br>39           | L<br>57      | B<br>37  | J<br>51            | J<br>33       |
| <b>1D</b>    | -                | stability                               | -              | -              | -              | -                 | -                 | U<br>29*     | -        | -                  | -             |
| <b>1E</b>    | [NiFe]           | large hyd,<br>H <sub>2</sub> conversion | C<br>28        | E<br>35        | G<br>35        | E<br>40           | D<br>38           | H<br>52      | D<br>36  | L<br>39            | L<br>32       |
| <b>1F</b>    | 2[Fe-S]          | e <sup>-</sup> input                    | n.r.           | F<br>29        | H<br>28        | F<br>32*          | I<br>31*          | X<br>33      | I<br>34* | N<br>36            | N<br>37       |
| <b>HycB1</b> | 4[Fe-S]          | e <sup>-</sup> transfer                 | n.r.           | n.r.           | n.r.           | -                 | -                 | F<br>36*     | n.r.     | n.r.               | n.r.          |
| <b>1280</b>  | 1[Fe-S]          | e <sup>-</sup> transfer                 | -              | -              | -              | -                 | -                 | -            | -        | -                  | -             |
| <b>1290</b>  | 1[Fe-S]          | e <sup>-</sup> transfer                 | -              | -              | -              | -                 | -                 | -            | -        | -                  | -             |
| Ech2         |                  |                                         | Nuo            | Hyc            | Hyf            | Ech               | Fpo               | Coo          | Nuo      | Mbh                | Mbx           |
| <b>2A1</b>   | 15 TMHs          | anchor, ion transport                   | L<br>33        | C<br>30        | D/B<br>39/28   | A<br>32           | L/M<br>34/27      | M<br>31      | L<br>35  | H<br>30            | H'/H<br>25/28 |
| <b>2A2</b>   | 10 TMHs          | anchor, ion transport                   | M<br>25*       | D<br>28*       | F<br>30*       | A<br>26*          | M<br>27*          | M<br>26*     | N<br>30* | H<br>30            | H'/H<br>29/28 |
| <b>2B</b>    | 7 TMHs           | anchor, ion transport                   | M<br>25*       | C<br>25*       | D/F<br>27*/30* | A<br>26           | M<br>27           | M<br>26*     | N<br>30* | H<br>30*           | H'/H<br>29/26 |
| <b>2C</b>    | 1[Fe-S]          | small hyd,<br>e <sup>-</sup> transfer   | -              | C/D<br>29*/27* | -              | B<br>28*          | -                 | K<br>34      | H<br>22* | H<br>30*           | M<br>30       |
| <b>2D</b>    | -                | stability                               | -              | -              | -              | -                 | -                 | -            | -        | -                  | -             |
| <b>2E</b>    | [NiFe]           | large hyd,<br>H <sub>2</sub> conversion | C<br>29        | E<br>39        | G<br>36        | E<br>37           | D<br>38           | H<br>45      | D<br>36  | L<br>38            | L<br>33       |
| <b>2F</b>    | 2[Fe-S]          | e <sup>-</sup> input                    | I<br>31*       | F<br>28*       | F<br>24*       | F<br>33*          | I<br>33*          | X<br>28*     | I<br>37* | N<br>33*           | N<br>41       |
| <b>HycB2</b> | 4[Fe-S]          | e <sup>-</sup> transfer                 | n.r.           | n.r.           | n.r.           | n.r.              | n.r.              | F<br>34*     | n.r.     | n.r.               | n.r.          |

214  
215  
216  
217

\*Cofactors and TMHs were determined using InterProScan and TMHMM Server v. 2.0. BLASTP 2.2.26+ was used for homology analyses. The numbers reflect the amino acid identities in %. Genomic data was retrieved for *E. coli* K-12 MG1655, *M. barkeri* Fusaro DSM 804, *C. hydrogeniformans* Z-2901 (*C. h.*), *P. furiosus* DSM 3638 from IMG/M ER. E-value > 1e-5; (\*); E-values 1e-5 >> 1e-20; (n.r.), hits not related to corresponding complex; (-), no hits; hyd, [NiFe] hydrogenase.

## Supplementary Tables

---

218 **Tab. S2. List of primers used in this study.**

| <b>Primer name</b> | <b>5'→3' sequence</b>        |
|--------------------|------------------------------|
| acn_for_qRT T.k.   | GCTTGTGGACCTTGTATTGG         |
| acn_rev_qRT T.k.   | AAACTGACGCTGACTTGG           |
| ech1A_for_qRT T.k. | CCTCCTTTGCCGGTGTAAATGAGTAAGG |
| ech1A_rev_qRT T.k. | AAGCATGGTAAACGCACCCAAC       |
| ech2D_for_qRT T.k. | CAATTGAAGCCTGAGATGTC         |
| ech2D_rev_qRT T.k. | AGCAGAATGGGCAGAAAG           |
| gyrB_for_qRT T.k.  | CCAGTTGTGCTTCCTTCTCGATTTCC   |
| gyrB_rev_qRT T.k.  | GCGACAATGCCATCTATGACTTCTCC   |

219



## Supplementary References

---

### 220 References

- 221
- 222 1. R. E. Hungate (1969) A roll tube method for cultivation of strict anaerobes. *Methods in*  
223 *Microbiology*, eds Norris J R and Ribbons D W (Academic Press, New York), pp 117-  
224 132.
- 225 2. Bryant M P (1972) Commentary on the Hungate technique for culture of anaerobic  
226 bacteria. *Am J Clin Nutr* 25: 1324-1328.
- 227 3. Schmidt K, Liaaen Jensen S, Schlegel H G (1963) Die Carotinoide der *Thiorhodaceae*.  
228 Okenon als Hauptcarotenoid von *Chromatium okenii* Perty. *Arch Mikrobiol* 46: 117-  
229 126.
- 230 4. Weghoff M C, Müller V (2016) CO metabolism in the thermophilic acetogen  
231 *Thermoanaerobacter kivui*. *Appl Environ Microbiol* 82: 2312-2319.
- 232 5. Bradford M M (1976) A rapid and sensitive method for the quantification of microgram  
233 quantities of protein utilizing the principle of proteine-dye-binding. *Anal Biochem* 72:  
234 248-254.
- 235 6. Heise R, Müller V, Gottschalk G (1992) Presence of a sodium-translocating ATPase in  
236 membrane vesicles of the homoacetogenic bacterium *Acetobacterium woodii*. *Eur J*  
237 *Biochem* 206: 553-557.
- 238 7. Hess V, Schuchmann K, Müller V (2013) The ferredoxin:NAD<sup>+</sup> oxidoreductase (Rnf)  
239 from the acetogen *Acetobacterium woodii* requires Na<sup>+</sup> and is reversibly coupled to the  
240 membrane potential. *J Biol Chem* 288: 31496-31502.
- 241 8. Livak K J, Schmittgen T D (2001) Analysis of relative gene expression data using real-  
242 time quantitative PCR and the 2<sup>-ΔΔC<sub>t</sub></sup> method. *Methods* 25: 402-408.
- 243 9. Schmittgen T D, Livak K J (2008) Analyzing real-time PCR data by the comparative  
244 C<sub>T</sub> method. *Nat Protoc* 3: 1101-1108.
- 245 10. Kimmich G A, Randles J, Brand J S (1975) Assay of picomole amounts of ATP, ADP  
246 and AMP using the luciferase enzyme system. *Anal Biochem* 69: 187-206.
- 247
